# Supplementary material for: Low Serum Cholesterol Level Is a Significant Prognostic Factor That Improves CLL-IPI in Chronic Lymphocytic Leukaemia
Source: MDPI journal article supplement (doi:10.3390/ijms24087396), 2023-04-17
Supplement: s1 [file s1]

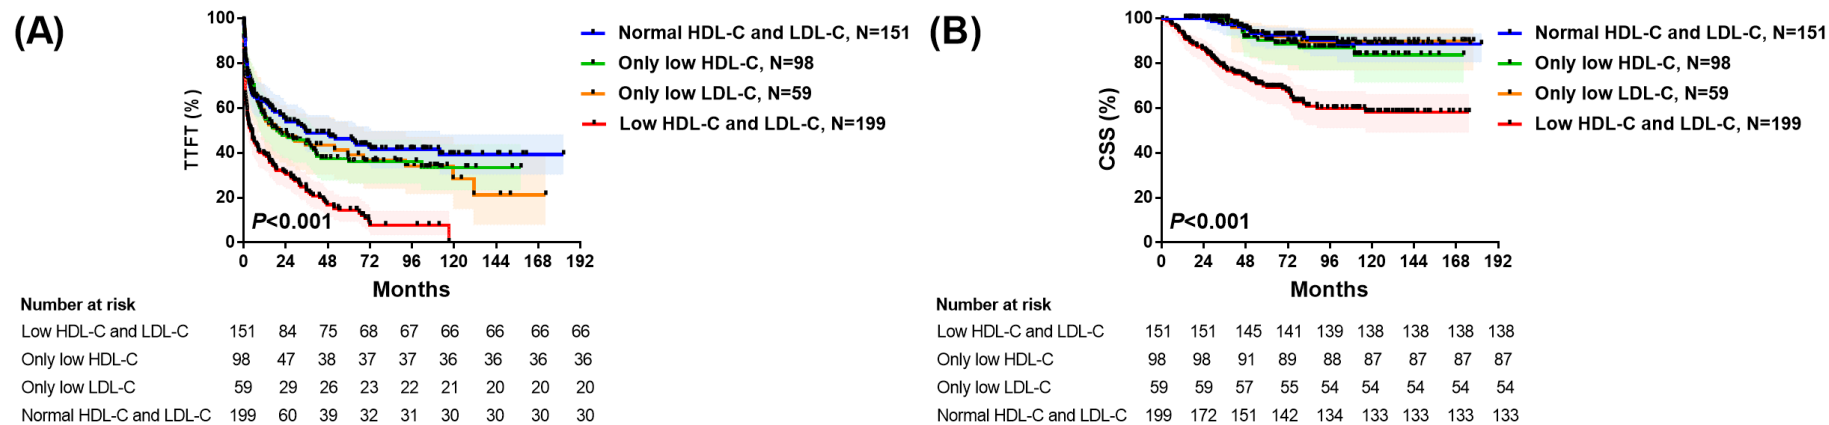

**Supplemental Figure S1.** Prognosis of four subgroups categorized by high-density lipoprotein cholesterol (HDL-C) and low-density lipoprotein cholesterol (LDL-C) cut-off values. **(A)** Kaplan-Meier survival curves of time-to-first-treatment (TTFT). **(B)** Kaplan-Meier survival curves of cancer-specific survival (CSS).

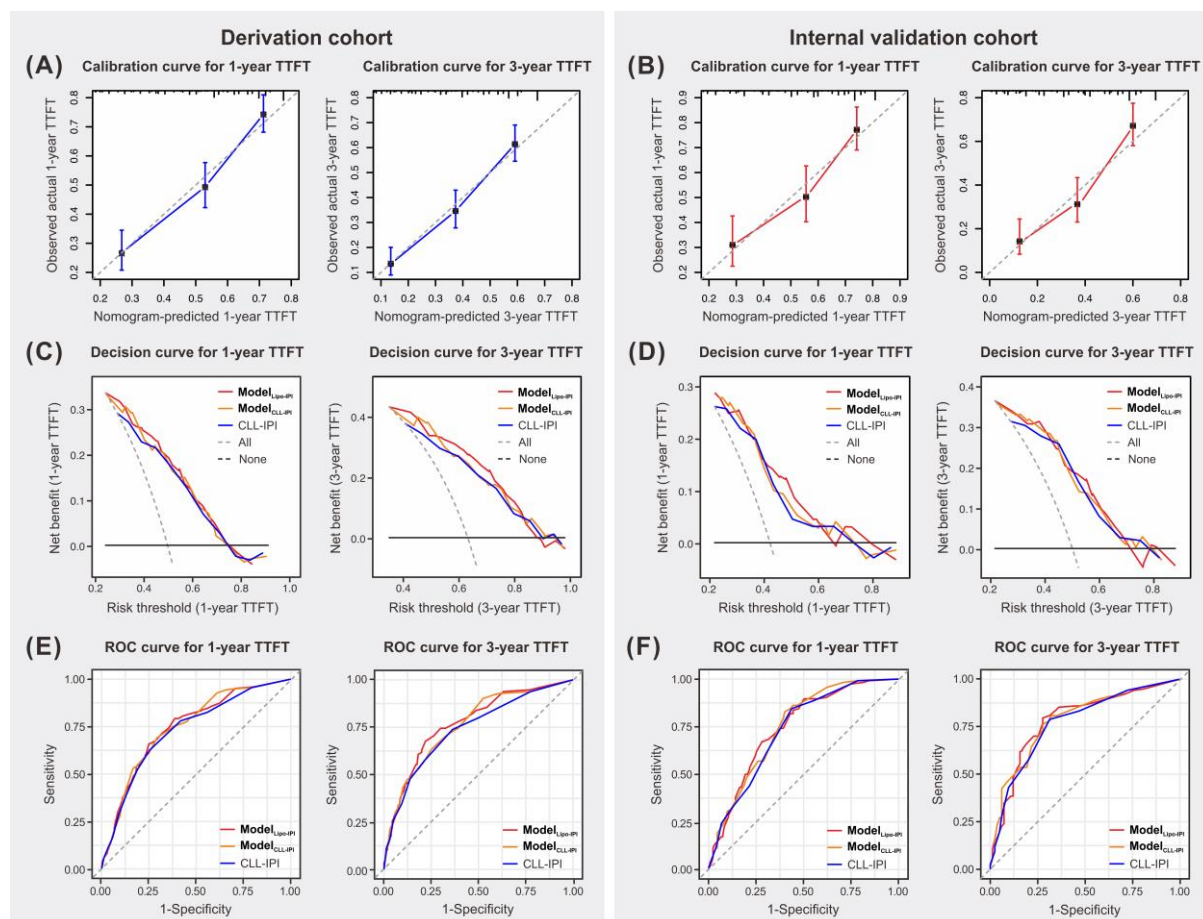

**Supplemental Figure S2.** Prognostic performance of Model<sub>Lipo-IPI</sub> for time-to-first-treatment (TTFT). **(A, B)** Calibration curves of Model<sub>Lipo-IPI</sub> for predicting 1-year and 3-year TTFT in the derivation **(A)** and internal validation **(B)** cohorts. **(C, D)** Decision curve analyses of different models for predicting 1-year and 3-year TTFT in the derivation **(C)** and internal validation **(D)** cohorts. **(E, F)** Receiver operating characteristic (ROC) curves of different models for predicting 1-year and 3-year TTFT in the derivation **(E)** and internal validation **(F)** cohorts. **Abbreviations:** CLL-IPI, international prognostic index for chronic lymphocytic leukaemia.

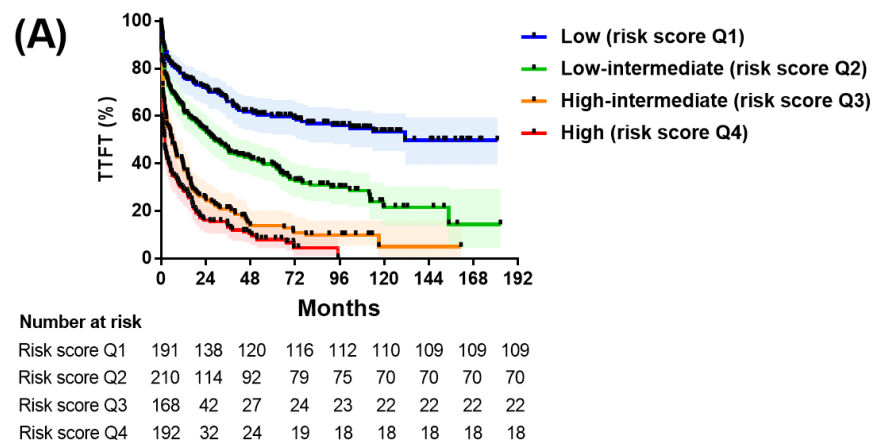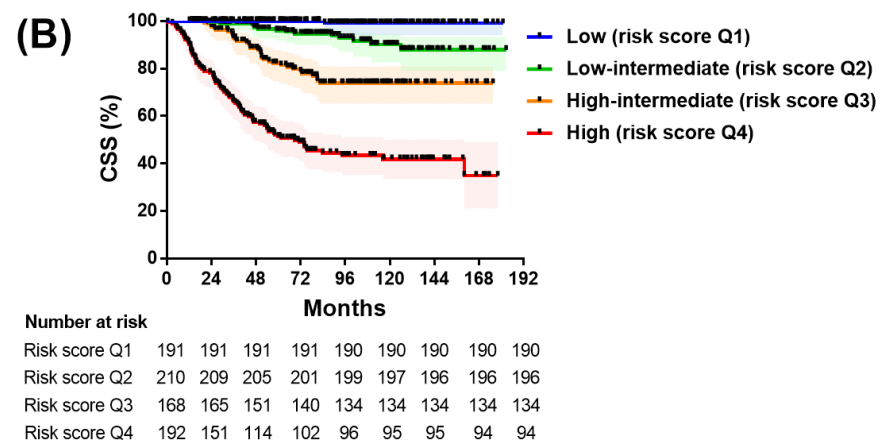

**Supplemental Figure S3.** Prognosis of four risk grades stratified by quantiles of Model<sub>Lipo-IPi</sub>. **(A)** Kaplan-Meier survival curves of time-to-first-treatment (TTFT). **(B)** Kaplan-Meier survival curves of cancer-specific survival (CSS).

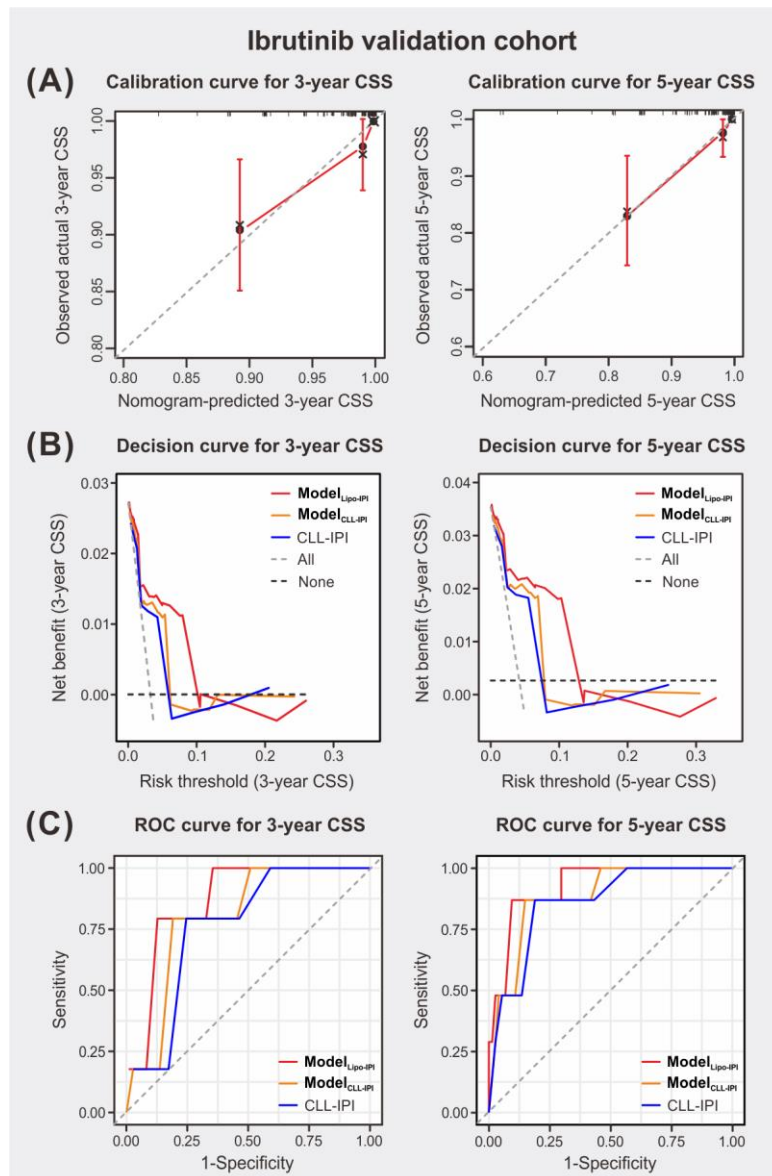

**Supplemental Figure S4.** Prognostic performance of Model<sub>Lipo-IPI</sub> for cancer-specific survival (CSS) in the ibrutinib validation cohort. **(A)** Calibration curves of Model<sub>Lipo-IPI</sub> for predicting 3-year and 5-year CSS. **(B)** Decision curve analyses of different models for predicting 3-year and 5-year CSS. **(C)** Receiver operating characteristic (ROC) curves of different models for predicting 3-year and 5-year CSS. **Abbreviations:** CLL-IPI, international prognostic index for chronic lymphocytic leukaemia.

**Supplemental Table S1.** Pairwise comparisons of four serum cholesterol groups for TTFT and CSS in the derivation cohort.

| Log-rank test<br>(Mantel-Cox)     | Serum cholesterol<br>group | Normal HDL-C and<br>LDL-C |         | Only low HDL-C |         | Only low LDL-C |         | Low HDL-C and<br>LDL-C |         |
|-----------------------------------|----------------------------|---------------------------|---------|----------------|---------|----------------|---------|------------------------|---------|
|                                   |                            | Chi- square               | p-value | Chi- square    | p-value | Chi- square    | p-value | Chi- square            | p-value |
| TTFT (Overall<br><i>p</i> <0.001) | Normal HDL-C and LDL-C     | –                         | –       | 1.038          | 0.308   | 1.045          | 0.307   | 49.374                 | <0.001  |
|                                   | Only low HDL-C             | 1.038                     | 0.308   | –              | –       | 0.012          | 0.914   | 25.976                 | <0.001  |
|                                   | Only low LDL-C             | 1.045                     | 0.307   | 0.012          | 0.914   | –              | –       | 19.251                 | <0.001  |
|                                   | Low HDL-C and LDL-C        | 49.374                    | <0.001  | 25.976         | <0.001  | 19.251         | <0.001  | –                      | –       |
| CSS (Overall<br><i>p</i> <0.001)  | Normal HDL-C and LDL-C     | –                         | –       | 0.575          | 0.448   | 0.002          | 0.962   | 34.523                 | <0.001  |
|                                   | Only low HDL-C             | 0.575                     | 0.448   | –              | –       | 0.414          | 0.520   | 18.709                 | <0.001  |
|                                   | Only low LDL-C             | 0.002                     | 0.962   | 0.414          | 0.520   | –              | –       | 15.585                 | <0.001  |
|                                   | Low HDL-C and LDL-C        | 34.523                    | <0.001  | 18.709         | <0.001  | 15.585         | <0.001  | –                      | –       |

**Abbreviations:** TTFT, time-to-first-treatment; CSS, cancer-specific survival; HDL-C, high-density lipoprotein cholesterol; LDL-C, low-density lipoprotein cholesterol.

**Supplemental Table S2.** Post-chemoimmunotherapeutic cholesterol fluctuation stratified by different treatment regimens and response to treatment.

| Treatment regimens                                     | Response to treatment | Total | Pre- or post-therapeutic | TC (mmol/L) | p-value | HDL-C (mmol/L) | p-value | LDL-C (mmol/L) | p-value |
|--------------------------------------------------------|-----------------------|-------|--------------------------|-------------|---------|----------------|---------|----------------|---------|
| Fludarabine + cyclophosphamide ± rituximab             | CR or PR              | 104   | Before                   | 3.94±1.05   | 0.006   | 0.99±0.3       | <0.001  | 2.48±0.67      | 0.005   |
|                                                        |                       |       | After                    | 4.22±0.97   |         | 1.09±0.31      |         | 2.70±0.70      |         |
|                                                        | SD or PD              | 79    | Before                   | 3.95±1.03   | 0.028   | 0.86±0.25      | 0.093   | 2.51±0.78      | 0.002   |
|                                                        |                       |       | After                    | 3.72±1.02   |         | 0.82±0.24      |         | 2.26±0.74      |         |
| Bendamustine ± rituximab                               | CR or PR              | 28    | Before                   | 3.89±0.88   | 0.266   | 0.95±0.30      | 0.154   | 2.44±0.67      | 0.384   |
|                                                        |                       |       | After                    | 4.13±1.03   |         | 1.06±0.39      |         | 2.57±0.70      |         |
|                                                        | SD or PD              | 9     | Before                   | 3.95±1.05   | 0.447   | 0.92±0.17      | 0.145   | 2.32±0.37      | 0.231   |
|                                                        |                       |       | After                    | 3.62±0.53   |         | 0.83±0.12      |         | 2.13±0.33      |         |
| Chlorambucil ± rituximab                               | CR or PR              | 52    | Before                   | 4.09±0.90   | 0.453   | 0.93±0.26      | 0.114   | 2.47±0.66      | 0.128   |
|                                                        |                       |       | After                    | 4.20±1.19   |         | 1.00±0.31      |         | 2.61±0.78      |         |
|                                                        | SD or PD              | 64    | Before                   | 3.99±1.03   | 0.005   | 0.94±0.28      | 0.001   | 2.51±0.71      | 0.027   |
|                                                        |                       |       | After                    | 3.63±1.00   |         | 0.81±0.25      |         | 2.32±0.73      |         |
| Ibrutinib ± rituximab                                  | CR or PR              | 78    | Before                   | 4.05±0.91   | <0.001  | 0.96±0.29      | <0.001  | 2.52±0.65      | <0.001  |
|                                                        |                       |       | After                    | 4.48±1.08   |         | 1.08±0.31      |         | 2.79±0.76      |         |
|                                                        | SD or PD              | 41    | Before                   | 3.90±1.04   | 0.065   | 0.93±0.20      | 0.708   | 2.53±0.84      | 0.036   |
|                                                        |                       |       | After                    | 3.61±1.00   |         | 0.91±0.27      |         | 2.27±0.75      |         |
| Ibrutinib + fludarabine + cyclophosphamide + rituximab | CR or PR              | 18    | Before                   | 4.19±1.30   | 0.755   | 1.05±0.33      | 0.566   | 2.62±0.90      | 0.874   |
|                                                        |                       |       | After                    | 4.27±1.22   |         | 1.10±0.29      |         | 2.59±0.93      |         |
|                                                        | SD or PD              | 5     | Before                   | 3.67±0.60   | 0.950   | 0.96±0.25      | 0.619   | 2.35±0.36      | 0.660   |
|                                                        |                       |       | After                    | 3.69±1.10   |         | 0.90±0.27      |         | 2.21±0.77      |         |
| Other treatments                                       | CR or PR              | 21    | Before                   | 4.08±1.12   | 0.013   | 1.03±0.34      | 0.104   | 2.50±0.88      | 0.071   |
|                                                        |                       |       | After                    | 4.71±1.00   |         | 1.15±0.34      |         | 2.98±0.86      |         |
|                                                        | SD or PD              | 22    | Before                   | 4.00±1.11   | 0.034   | 1.00±0.31      | 0.004   | 2.46±0.89      | 0.028   |
|                                                        |                       |       | After                    | 3.55±0.94   |         | 0.83±0.29      |         | 2.15±0.72      |         |

**Abbreviations:** TC, total cholesterol; HDL-C, high-density lipoprotein cholesterol; LDL-C, low-density lipoprotein cholesterol; CR, complete remission; PR, partial remission; SD, stable disease; PD, progressive disease.

**Supplemental Table S3.** Post-chemoimmunotherapeutic cholesterol fluctuation stratified by different biological variables and response to treatment.

| Biological variables   | Status    | Response to treatment | Total | Pre- or post-therapeutic | TC (mmol/L) | p-value | HDL-C (mmol/L) | p-value | LDL-C (mmol/L) | p-value |
|------------------------|-----------|-----------------------|-------|--------------------------|-------------|---------|----------------|---------|----------------|---------|
| <i>TP53</i> disruption | Absence   | CR or PR              | 237   | Before                   | 4.06±1.01   | <0.001  | 0.98±0.29      | <0.001  | 2.54±0.67      | 0.001   |
|                        |           |                       |       | After                    | 4.34±1.06   |         | 1.07±0.32      |         | 2.71±0.74      |         |
|                        | Presence  | SD or PD              | 153   | Before                   | 3.99±1.04   | <0.001  | 0.94±0.27      | <0.001  | 2.53±0.80      | <0.001  |
|                        |           |                       |       | After                    | 3.40±1.06   |         | 0.85±0.26      |         | 2.24±0.71      |         |
|                        |           | CR or PR              | 64    | Before                   | 3.84±1.03   | 0.002   | 0.95±0.32      | 0.001   | 2.31±0.79      | 0.001   |
|                        |           |                       |       | After                    | 4.22±1.19   |         | 1.08±0.33      |         | 2.70±0.87      |         |
| <i>ATM</i> deletion    | Absence   | SD or PD              | 67    | Before                   | 3.86±1.01   | 0.007   | 0.86±0.24      | 0.090   | 2.41±0.67      | 0.101   |
|                        |           |                       |       | After                    | 3.58±1.07   |         | 0.81±0.24      |         | 2.30±0.77      |         |
|                        | Presence  | CR or PR              | 248   | Before                   | 4.01±1.04   | <0.001  | 0.98±0.30      | <0.001  | 2.48±0.72      | <0.001  |
|                        |           |                       |       | After                    | 4.31±1.12   |         | 1.08±0.32      |         | 2.71±0.79      |         |
|                        |           | SD or PD              | 183   | Before                   | 3.94±1.03   | <0.001  | 0.91±0.26      | <0.001  | 2.49±0.77      | <0.001  |
|                        |           |                       |       | After                    | 3.48±1.10   |         | 0.84±0.26      |         | 2.28±0.74      |         |
| <i>IGHV</i>            | unmutated | CR or PR              | 53    | Before                   | 4.06±0.94   | 0.070   | 0.96±0.27      | 0.001   | 2.56±0.61      | 0.101   |
|                        |           |                       |       | After                    | 4.31±0.91   |         | 1.08±0.30      |         | 2.71±0.66      |         |
|                        | mutated   | SD or PD              | 37    | Before                   | 3.98±1.05   | <0.001  | 0.92±0.28      | 0.013   | 2.53±0.76      | 0.002   |
|                        |           |                       |       | After                    | 3.33±0.90   |         | 0.81±0.25      |         | 2.16±0.65      |         |
|                        |           | CR or PR              | 167   | Before                   | 4.04±1.08   | <0.001  | 0.98±0.29      | <0.001  | 2.52±0.73      | <0.001  |
|                        |           |                       |       | After                    | 4.36±1.06   |         | 1.10±0.31      |         | 2.72±0.72      |         |
| <i>IGHV</i>            | unmutated | SD or PD              | 108   | Before                   | 3.92±1.07   | <0.001  | 0.96±0.29      | 0.009   | 2.44±0.80      | 0.069   |
|                        |           |                       |       | After                    | 3.47±1.08   |         | 0.89±0.25      |         | 2.31±0.71      |         |
|                        | mutated   | CR or PR              | 134   | Before                   | 3.98±0.94   | 0.004   | 0.97±0.31      | 0.004   | 2.45±0.67      | 0.001   |
|                        |           |                       |       | After                    | 4.25±1.12   |         | 1.05±0.33      |         | 2.69±0.82      |         |
|                        |           | SD or PD              | 112   | Before                   | 3.98±0.99   | <0.001  | 0.86±0.23      | <0.001  | 2.55±0.73      | <0.001  |
|                        |           |                       |       | After                    | 3.44±1.06   |         | 0.78±0.25      |         | 2.21±0.75      |         |

|      |      |          |     |        |           |        |           |        |           |        |
|------|------|----------|-----|--------|-----------|--------|-----------|--------|-----------|--------|
| CD38 | <30% | CR or PR | 224 | Before | 4.00±1.05 | <0.001 | 0.97±0.31 | <0.001 | 2.49±0.72 | <0.001 |
|      |      |          |     | After  | 4.28±1.13 |        | 1.08±0.33 |        | 2.71±0.77 |        |
|      |      | SD or PD | 144 | Before | 3.89±0.99 | <0.001 | 0.91±0.26 | 0.001  | 2.45±0.73 | <0.001 |
|      |      |          |     | After  | 3.46±1.08 |        | 0.85±0.26 |        | 2.25±0.72 |        |
|      | ≥30% | CR or PR | 77  | Before | 4.07±0.91 | <0.001 | 0.97±0.27 | <0.001 | 2.50±0.65 | 0.004  |
|      |      |          |     | After  | 4.39±0.97 |        | 1.05±0.30 |        | 2.71±0.76 |        |
|      |      | SD or PD | 76  | Before | 4.06±1.09 | <0.001 | 0.91±0.27 | 0.003  | 2.59±0.83 | 0.001  |
|      |      |          |     | After  | 3.44±1.05 |        | 0.82±0.24 |        | 2.27±0.75 |        |

**Abbreviations:** TC, total cholesterol; HDL-C, high-density lipoprotein cholesterol; LDL-C, low-density lipoprotein cholesterol; CR, complete remission; PR, partial remission; SD, stable disease; PD, progressive disease; *IGHV*, immunoglobulin heavy chain variable region.



**Supplemental Table S4.** Pairwise comparisons of four nomogram risk score groups for TTFT and CSS in the entire cohort.

| Log-rank test<br>(Mantel-Cox)     | Risk group                        | Low<br>(risk score Q1) |         | Low-intermediate<br>(risk score Q2) |         | High-intermediate<br>(risk score Q3) |         | High<br>(risk score Q4) |         |
|-----------------------------------|-----------------------------------|------------------------|---------|-------------------------------------|---------|--------------------------------------|---------|-------------------------|---------|
|                                   |                                   | Chi- square            | p-value | Chi- square                         | p-value | Chi- square                          | p-value | Chi- square             | p-value |
|                                   |                                   |                        |         |                                     |         |                                      |         |                         |         |
| TTFT (Overall<br><i>p</i> <0.001) | Low (risk score Q1)               | –                      | –       | 27.125                              | <0.001  | 107.082                              | <0.001  | 163.966                 | <0.001  |
|                                   | Low-intermediate (risk score Q2)  | 27.125                 | <0.001  | –                                   | –       | 37.906                               | <0.001  | 86.515                  | <0.001  |
|                                   | High-intermediate (risk score Q3) | 107.082                | <0.001  | 37.906                              | <0.001  | –                                    | –       | 8.306                   | 0.004   |
|                                   | High (risk score Q4)              | 163.966                | <0.001  | 86.515                              | <0.001  | 8.306                                | 0.004   | –                       | –       |
| CSS (Overall<br><i>p</i> <0.001)  | Low (risk score Q1)               | –                      | –       | 11.312                              | 0.001   | 43.024                               | <0.001  | 134.991                 | <0.001  |
|                                   | Low-intermediate (risk score Q2)  | 11.312                 | 0.001   | –                                   | –       | 17.145                               | <0.001  | 108.364                 | <0.001  |
|                                   | High-intermediate (risk score Q3) | 43.024                 | <0.001  | 17.145                              | <0.001  | –                                    | –       | 41.233                  | <0.001  |
|                                   | High (risk score Q4)              | 134.991                | <0.001  | 108.364                             | <0.001  | 41.233                               | <0.001  | –                       | –       |

**Abbreviations:** TTFT, time-to-first-treatment; CSS, cancer-specific survival.

**Supplemental Table S5.** Univariate and multivariate analyses of CSS including regimen types in treated patients of the entire cohort.

| Variables                     | CSS                 |         |                       |         |
|-------------------------------|---------------------|---------|-----------------------|---------|
|                               | Univariate analyses |         | Multivariate analyses |         |
|                               | HR (95% CI)         | p-value | HR (95% CI)           | p-value |
| Male                          | 1.165 (0.796–1.706) | 0.432   | –                     | –       |
| Age >65 years                 | 1.604 (1.124–2.288) | 0.009   | 1.577 (1.103–2.255)   | 0.013   |
| Binet B/C                     | 3.472 (1.762–6.842) | <0.001  | 1.423 (0.713–2.841)   | 0.317   |
| ECOG PS >1                    | 1.435 (0.897–2.295) | 0.132   |                       |         |
| B symptoms                    | 0.881 (0.582–1.335) | 0.550   | –                     | –       |
| Novel targeted therapies*     | 0.100 (0.037–0.272) | <0.001  | 0.095 (0.035–0.257)   | <0.001  |
| ALC >50×10 <sup>9</sup> /L    | 1.184 (0.806–1.738) | 0.390   | –                     | –       |
| Hb <100 g/L                   | 1.745 (1.211–2.515) | 0.003   | 0.999 (0.661–1.511)   | 0.998   |
| PLT <100×10 <sup>9</sup> /L   | 1.809 (1.274–2.570) | 0.001   | 1.150 (0.793–1.668)   | 0.462   |
| LDH >ULN (271 U/L)            | 1.750 (1.214–2.522) | 0.003   | 1.022 (0.679–1.539)   | 0.916   |
| β <sub>2</sub> -MG >3.50 mg/L | 2.073 (1.427–3.011) | <0.001  | 1.209 (0.823–1.775)   | 0.334   |
| <i>TP53</i> disruption        | 4.416 (3.102–6.287) | <0.001  | 3.221 (2.255–4.600)   | <0.001  |
| <i>ATM</i> deletion           | 0.707 (0.418–1.196) | 0.196   | –                     | –       |
| <i>IGHV</i> unmutated         | 3.053 (2.082–4.477) | <0.001  | 3.239 (2.199–4.772)   | <0.001  |
| CD38 ≥30%                     | 1.453 (1.006–2.099) | 0.047   | 1.103 (0.755–1.614)   | 0.612   |
| Low HDL-C and LDL-C           | 3.735 (2.517–5.543) | <0.001  | 3.437 (2.302–5.131)   | <0.001  |

**Abbreviations:** CSS, cancer-specific survival; HR, hazard ratio; 95% CI, 95% confidence interval; ECOG, eastern cooperative oncology group; PS, performance status; ALC, absolute lymphocytic count; Hb, haemoglobin; PLT, platelet; LDH, lactate dehydrogenase; β<sub>2</sub>-MG, β<sub>2</sub>-microglobulin; *IGHV*, immunoglobulin heavy chain variable region; HDL-C, high-density lipoprotein cholesterol; LDL-C, low-density lipoprotein cholesterol; ULN, upper limit of normal.

\*Novel targeted therapies refer to ibrutinib ± rituximab, ibrutinib + fludarabine + cyclophosphamide + rituximab and part of the other treatments.

**Supplemental Table S6.** Comparisons of C-indexes, 3-year and 5-year AUC between models and CLL-IPI in the ibrutinib validation cohort.

| Models                    | CSS                         |                  |
|---------------------------|-----------------------------|------------------|
|                           | Ibrutinib validation cohort |                  |
|                           | C-index (95% CI)            | p-value          |
| Model <sub>Lipo-IPI</sub> | 0.889 (0.846–0.932)         |                  |
| Model <sub>CLL-IPI</sub>  | 0.835 (0.776–0.894)         | <b>0.002</b>     |
| CLL-IPI                   | 0.807 (0.742–0.872)         | <b>0.001</b>     |
|                           | 3-year AUC (95% CI)         | p-value          |
| Model <sub>Lipo-IPI</sub> | 0.864 (0.757–0.972)         |                  |
| Model <sub>CLL-IPI</sub>  | 0.797 (0.653–0.942)         | <b>0.005</b>     |
| CLL-IPI                   | 0.760 (0.606–0.914)         | <b>&lt;0.001</b> |
|                           | 5-year AUC (95% CI)         | p-value          |
| Model <sub>Lipo-IPI</sub> | 0.926 (0.852–1.000)         |                  |
| Model <sub>CLL-IPI</sub>  | 0.882 (0.774–0.990)         | <b>0.028</b>     |
| CLL-IPI                   | 0.860 (0.737–0.982)         | <b>0.015</b>     |

**Abbreviations:** C-index, concordance index; AUC, area under the curve; CLL, chronic lymphocytic leukaemia; IPI, international prognostic index; CSS, cancer-specific survival; 95% CI, 95% confidence interval; Model<sub>Lipo-IPI</sub>, model generated by nomogram with cholesterol profile; Model<sub>CLL-IPI</sub>, model generated by nomogram without cholesterol profile.
